# Supplementary material
Source: Springer Nature journal article supplement (https://www.springermedizin.de/resource/supplementary/12961_2011_230_MOESM2_ESM.pdf/9570830)
Supplement: MOESM2 [file 9570830]

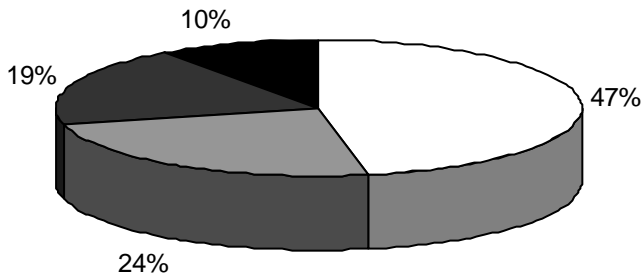

- Researcher
- Public Health Manager, Monitoring & Evaluation, Surveillance
- Clinician
- Other (e.g. Social Scientist, PhD student)
